# Supplementary material
Source: Springer Nature journal article supplement (https://www.springermedizin.de/resource/supplementary/12985_2009_672_MOESM1_ESM.pdf/9608238)

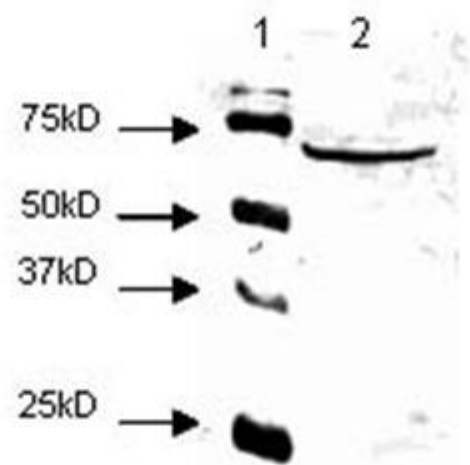

a.

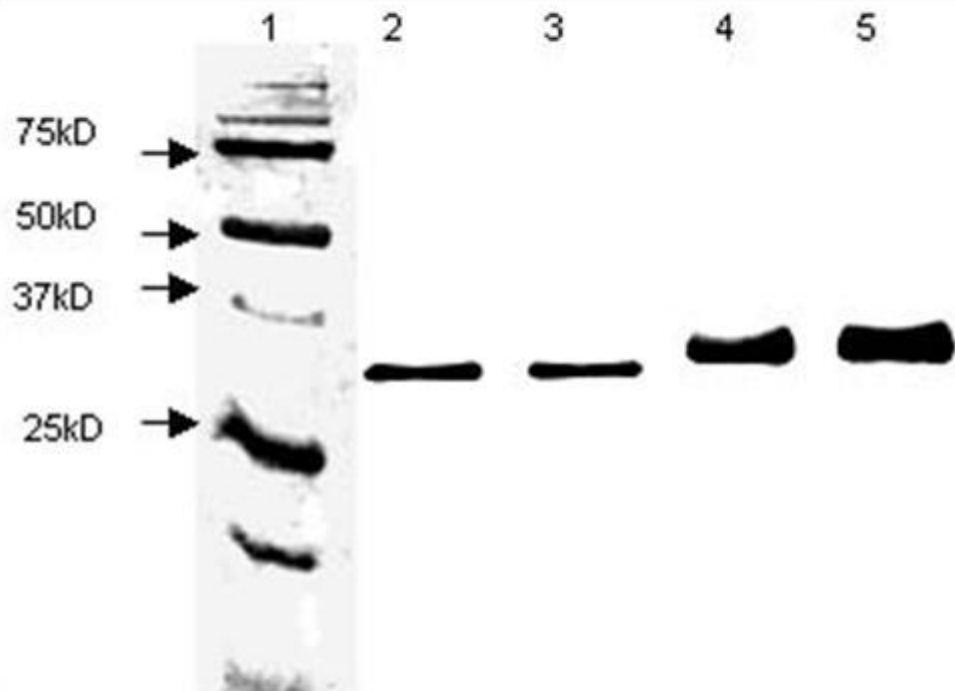

b.

Supplement: MOESM1 [file 9608238]
